# Supplementary material
Source: PubMed Central journal article supplement (PMC5679304)
Supplement: NIHMS903791-supplement-1.pdf [file NIHMS903791-supplement-1.pdf]

# Supplemental data

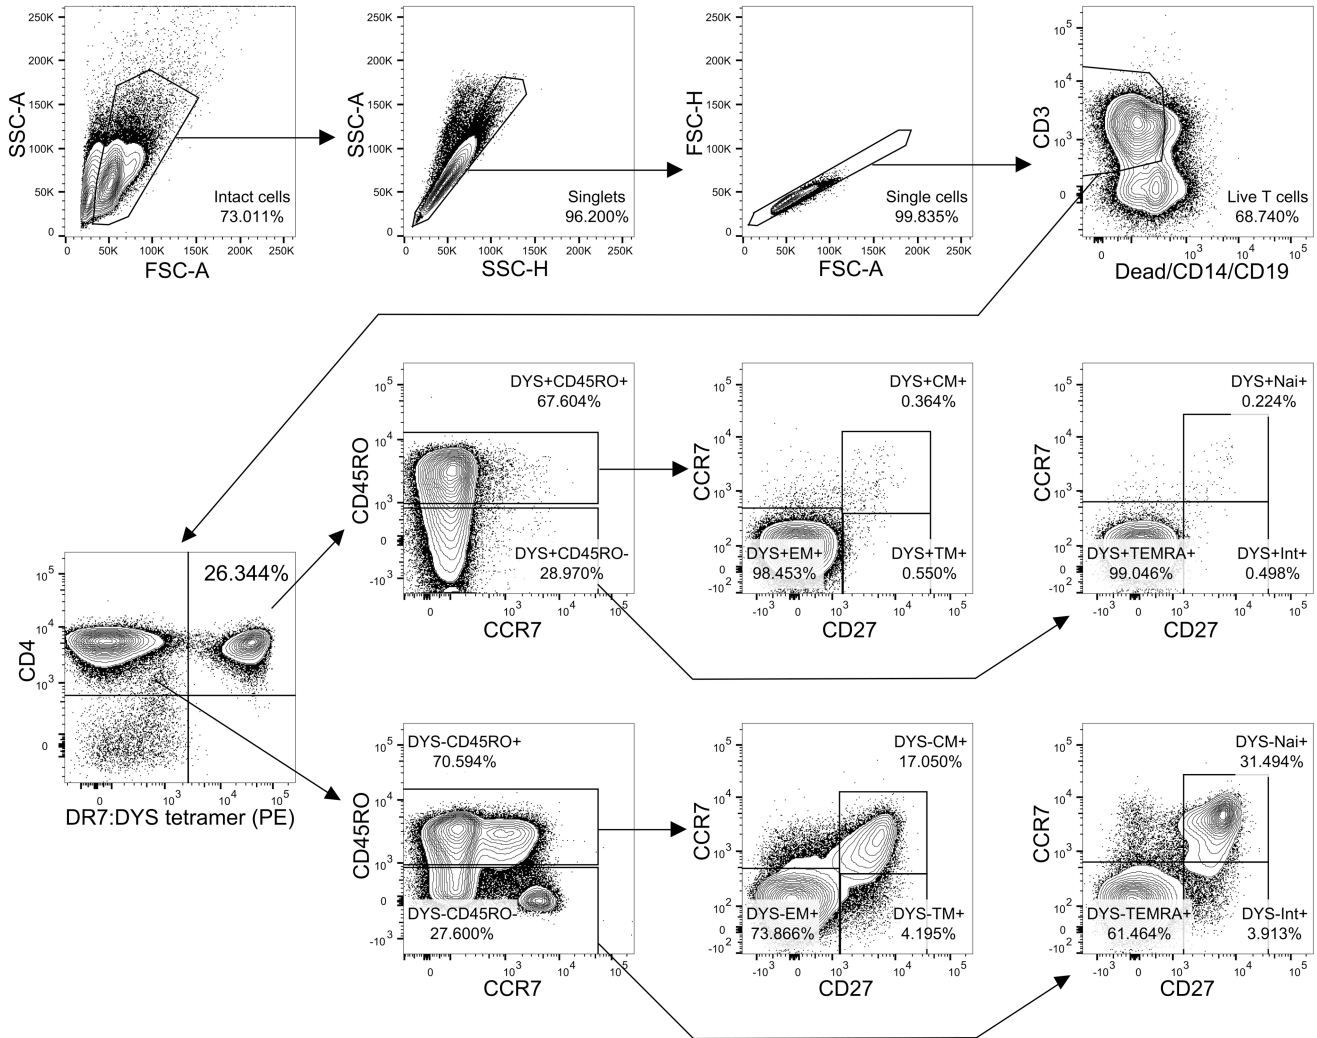

**SUPPLEMENTAL FIGURE 1.** Representative gating hierarchy for CD4<sup>+</sup> T cell tetramer staining. FlowJo plots were obtained from CD4-enriched PBMCs of subject 10027's tp2 using PE-conjugated DR7:DYS tetramer. DYS<sup>-</sup> and DYS<sup>+</sup>: DYS<sup>-</sup> and DYS<sup>+</sup> CD4<sup>+</sup> T cells, respectively; CM<sup>+</sup>, TM<sup>+</sup>, and EM<sup>+</sup>: central, transitional and effector memory T cells, respectively; Nai<sup>+</sup>, Int<sup>+</sup> and TEMRA<sup>+</sup>: naïve, intermediate and T-effector memory-RA<sup>+</sup> T cells, respectively. Data represent ten biological replicates. The CD4 vs. DR7:DYS tetramer (PE) plot is also shown in fig. 1B.

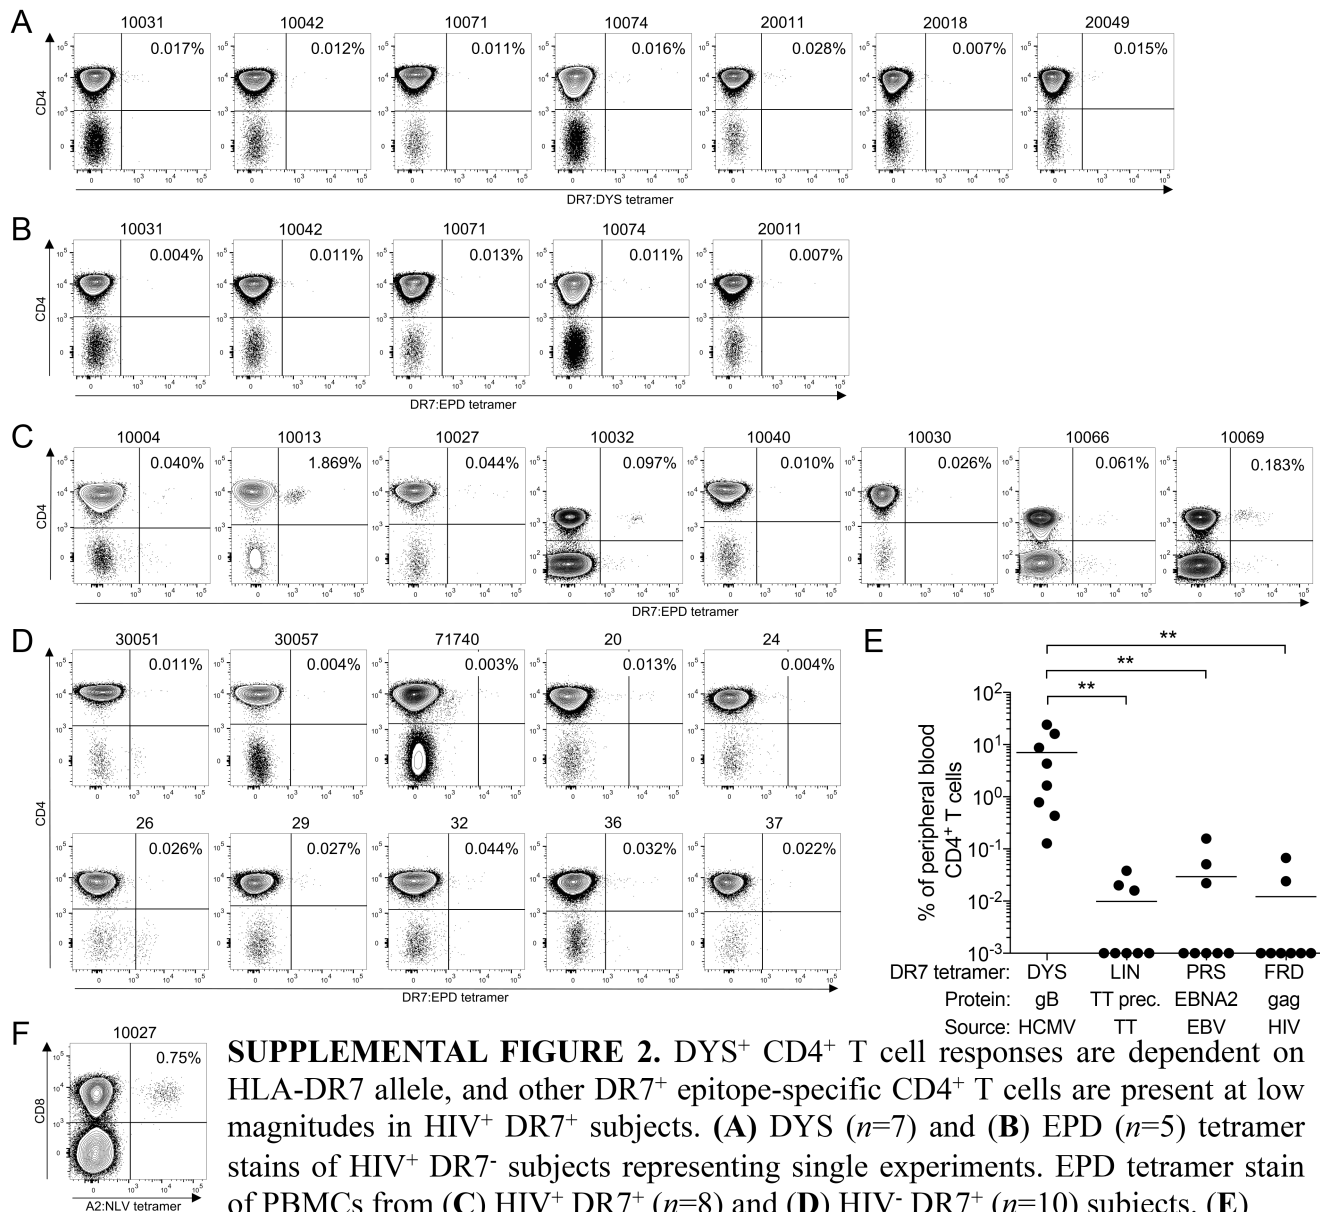

**SUPPLEMENTAL FIGURE 2. DYS<sup>+</sup> CD4<sup>+</sup> T cell responses are dependent on HLA-DR7 allele, and other DR7<sup>+</sup> epitope-specific CD4<sup>+</sup> T cells are present at low magnitudes in HIV<sup>+</sup> DR7<sup>+</sup> subjects. (A) DYS ( $n=7$ ) and (B) EPD ( $n=5$ ) tetramer stains of HIV<sup>+</sup> DR7<sup>-</sup> subjects representing single experiments. EPD tetramer stain of PBMCs from (C) HIV<sup>+</sup> DR7<sup>+</sup> ( $n=8$ ) and (D) HIV<sup>-</sup> DR7<sup>+</sup> ( $n=10$ ) subjects. (E)**

Response magnitude comparisons of DR7-restricted CD4<sup>+</sup> T cells from the HIV<sup>+</sup> HCMV<sup>+</sup> DR7<sup>+</sup> cohort that are specific for DYS, tetanus toxoid precursor LIN, EBV EBNA2 PRS or HIV gag FRD epitopes ( $n=8$ ; tp1 of Subject 10004, and tp2 of Subjects 10013, 10027 and 10032). (F) CD8 A2:NLV tetramer stain of Subject 10027's tp2 PBMCs. Data represent at least two biological replicates except Subject 10032's EPD tetramer stain due to insufficient cells and panel (E). PBMCs were CD4-enriched or left untouched.

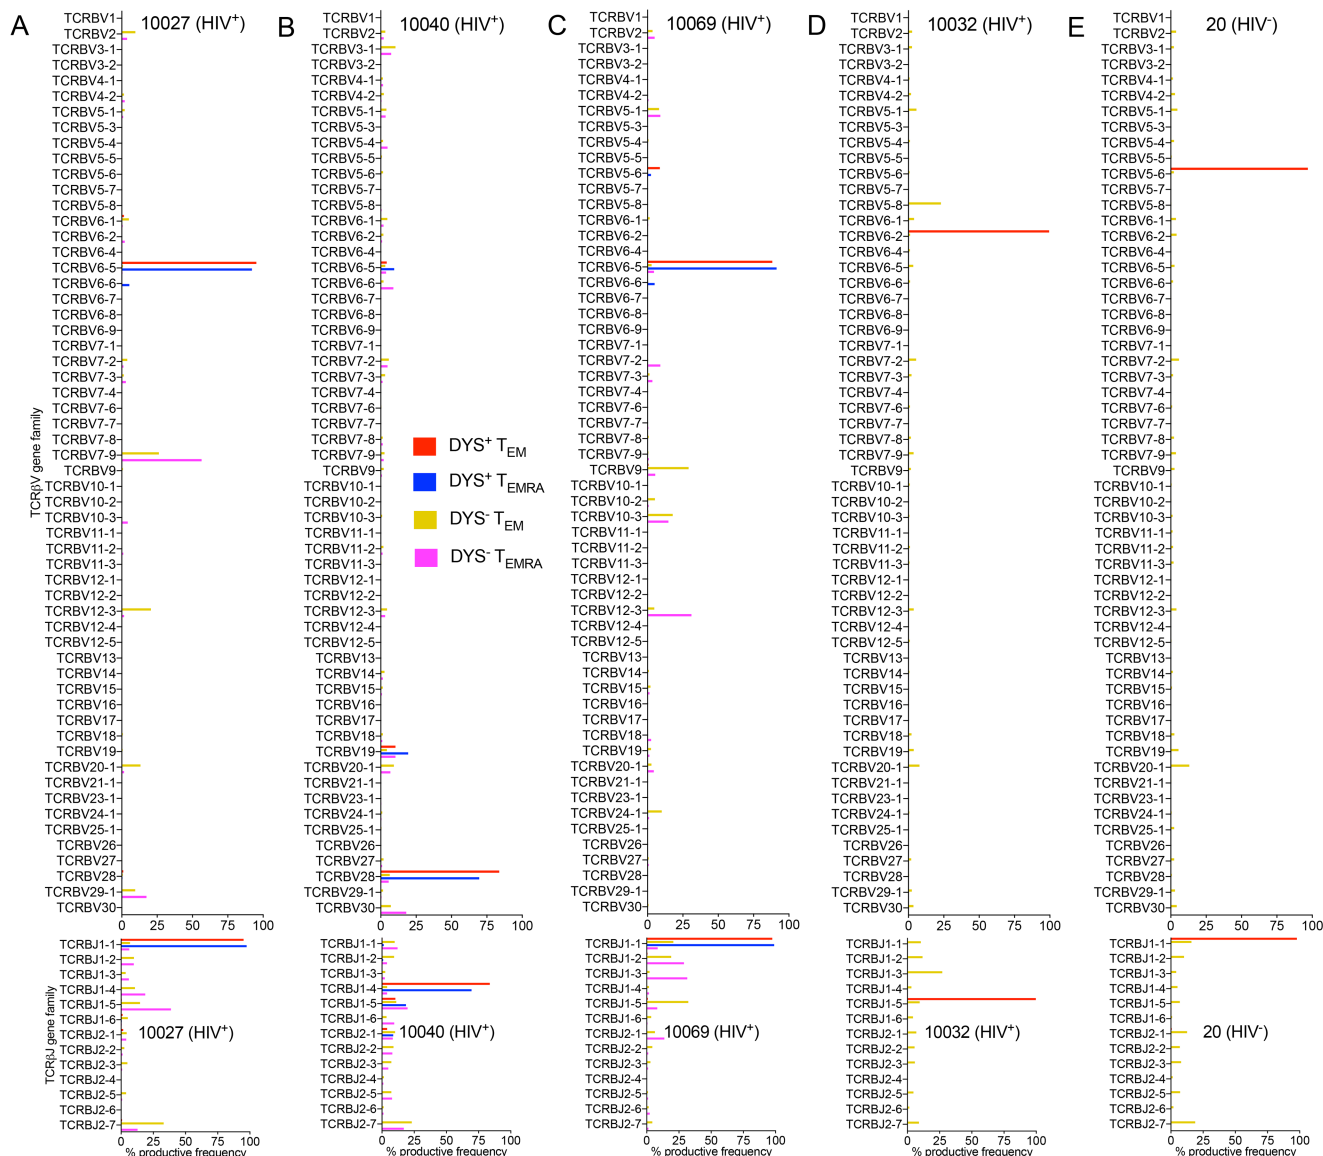

**SUPPLEMENTAL FIGURE 3.** Magnitudes of the highly restricted TCRβV and TCRβJ gene families of bulk-sorted, inflated  $DYS^+ CD4^+$  T cells. Data represent single experiments for Subjects (A) 10027, (B) 10040, (C) 10069, (D) 10032, and (E) 20, which complement fig. 3. Top row: TCRβV; bottom row: TCRβJ.

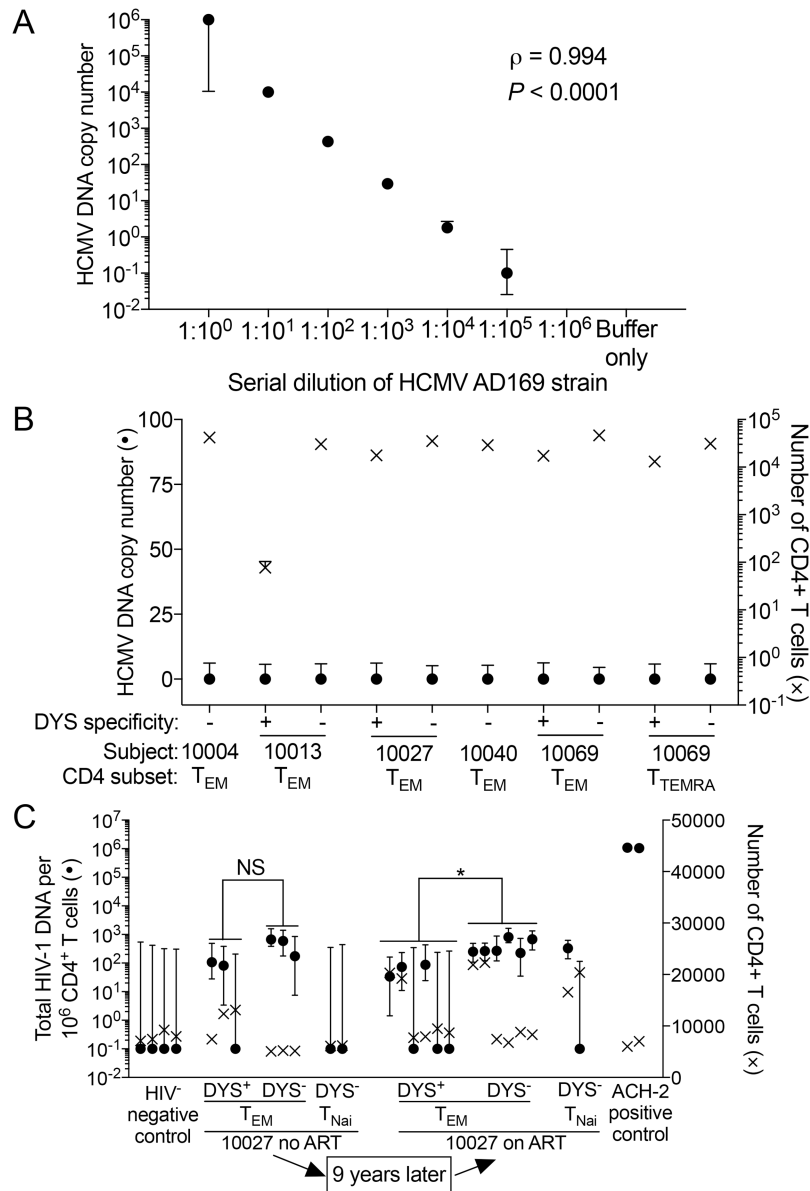

**SUPPLEMENTAL FIGURE 4.** Inflated  $DYS^+$   $CD4^+$  T cells serve as latent HIV but not HCMV reservoirs. **A–B:** Droplet digital PCR (ddPCR) HCMV DNA quantitation in single experiments of **(A)** HCMV AD169 strain serial dilutions, and **(B)**  $DYS^+$  and  $DYS^-$   $CD4^+$  T cells from  $HIV^+$  HCMV<sup>+</sup> DR7<sup>+</sup> subjects ( $n=6$ ). **(C)** ddPCR HIV DNA quantitation comparison between  $DYS^+$  and  $DYS^-$   $CD4^+$  T<sub>EM</sub> from Subject 10027's tp1 (no ART) and tp2 (on ART). Data represent 3 technical replicates except tp2 with two biological replicates containing 3 technical replicates each. Data points at  $10^{-1}$  indicate undetected HIV DNA. All graphs show 95% CI.
